# Supplementary material
Source: MDPI journal article supplement (https://www.mdpi.com/2673-6209/4/1/1)
Supplement: s1 [file s1]

## Supplementary Materials

### Simple one-pot synthesis of hexakis(2-alkoxy-1,5-phenyleneimine) macrocycles by precipitation-driven cyclization

Toshihiko Matsumoto

*Department of Industrial Chemistry, Graduate School of Engineering, Tokyo Polytechnic University, Atsugi, Kanagawa 243-0297, Japan*

#### Experimental procedures

**Scheme S1.** Synthesis of (*S*)-(-)-3,7-dimethyloctan-1-ol.

**Scheme S2.** Synthesis of (*S*)-(-)-1-bromo-3,7-dimethyloctane.

**Scheme S3.** Synthesis of 1-bromo-2-(2-(2-methoxyethoxy)ethoxy)ethane.

**Figure S1.** <sup>1</sup>H-NMR spectrum of (*S*)-(-)-3,7-dimethyloctan-1-ol.

**Figure S2.** <sup>13</sup>C-NMR spectrum of (*S*)-(-)-3,7-dimethyloctan-1-ol.

**Figure S3.** <sup>1</sup>H-NMR spectrum of (*S*)-(-)-1-bromo-3,7-dimethyloctane.

**Figure S4.** <sup>13</sup>C-NMR spectrum of (*S*)-(-)-1-bromo-3,7-dimethyloctane.

**Figure S5.** <sup>1</sup>H-NMR spectrum of 1-bromo-2-(2-(2-methoxyethoxy)ethoxy)ethane.

**Figure S6.** <sup>13</sup>C-NMR spectrum of 1-bromo-2-(2-(2-methoxyethoxy)ethoxy)ethane.

**Figure S7.** <sup>1</sup>H-NMR spectrum of 2-octyloxy-5-nitrobenzaldehyde.

**Figure S8.** <sup>13</sup>C-NMR spectrum of 2-octyloxy-5-nitrobenzaldehyde.

**Figure S9.** <sup>1</sup>H-NMR spectrum of 2-((*S*)-(-)-3,7-dimethyloctyloxy)-5-nitrobenzaldehyde.

**Figure S10.** <sup>13</sup>C-NMR spectrum of 2-((*S*)-(-)-3,7-dimethyloctyloxy)-5-nitrobenzaldehyde.

**Figure S11.** <sup>13</sup>C-NMR(DEPT-135) spectrum of 2-((*S*)-(-)-3,7-dimethyloctyloxy)-5-nitrobenzaldehyde.

**Figure S12.** H,H-cosy spectrum of 2-((*S*)-(-)-3,7-dimethyloctyloxy)-5-nitrobenzaldehyde.

**Figure S13.** H,H-cosy spectrum of 2-((*S*)-(-)-3,7-dimethyloctyloxy)-5-nitrobenzaldehyde (expanded).

**Figure S14.** C,H-cosy spectrum of 2-((*S*)-(-)-3,7-dimethyloctyloxy)-5-nitrobenzaldehyde.

**Figure S15.** C,H-cosy spectrum of 2-((*S*)-(-)-3,7-dimethyloctyloxy)-5-nitrobenzaldehyde (expanded).

**Figure S16.** <sup>1</sup>H-NMR spectrum of 2-(2-(2-(2-methoxyethoxy)ethoxy)ethoxy)-5-nitrobenzaldehyde.

**Figure S17.** <sup>13</sup>C-NMR spectrum of 2-(2-(2-(2-methoxyethoxy)ethoxy)ethoxy)-5-nitrobenzaldehyde.

**Figure S18.** H,H-cosy spectrum of 2-(2-(2-(2-methoxyethoxy)ethoxy)ethoxy)-5-nitrobenzaldehyde.

**Figure S19.** H,H-cosy spectrum of 2-(2-(2-(2-methoxyethoxy)ethoxy)ethoxy)-5-nitrobenzaldehyde (expanded).

**Figure S20.** C,H-cosy spectrum of 2-(2-(2-(2-methoxyethoxy)ethoxy)ethoxy)-5-nitrobenzaldehyde.

**Figure S21.** C,H-cosy spectrum of 2-(2-(2-(2-methoxyethoxy)ethoxy)ethoxy)-5-nitrobenzaldehyde (expanded).

**Figure S22.** <sup>1</sup>H-NMR spectrum of 2-octyloxy-5-nitrobenzaldehyde diethyl acetal.

**Figure S23.** <sup>13</sup>C-NMR spectrum of 2-octyloxy-5-nitrobenzaldehyde diethyl acetal.

**Figure S24.**  $^1\text{H}$ -NMR spectrum of 2-((*S*)-(-)-3,7-dimethyloctyloxy)-5-nitrobenzaldehyde diethyl acetal.

**Figure S25.**  $^{13}\text{C}$ -NMR spectrum of 2-((*S*)-(-)-3,7-dimethyloctyloxy)-5-nitrobenzaldehyde diethyl acetal.

**Figure S26.**  $^1\text{H}$ -NMR spectrum of 2-(2-(2-(2-methoxyethoxy)ethoxy)ethoxy)-5-nitrobenzaldehyde diethylacetal.

**Figure S27.**  $^{13}\text{C}$ -NMR spectrum of 2-(2-(2-(2-methoxyethoxy)ethoxy)ethoxy)-5-nitrobenzaldehyde diethylacetal.

**Figure S28.** FT-IR spectrum of hexakis(2-octyloxy-1,5-phenyleneimine) macrocycle OcO-Cm6.

**Figure S29.**  $^1\text{H}$ -NMR spectrum of hexakis(2-octyloxy-1,5-phenyleneimine) macrocycle (OcO-Cm6) in  $\text{CDCl}_3$ .

**Figure S30.** FT-IR spectrum of hexakis(2-((*S*)-(-)-3,7-dimethyloctyloxy)-1,5-phenyleneimine) macrocycle ((-)-BCO-Cm6).

**Figure S31.**  $^1\text{H}$ -NMR spectrum of hexakis(2-((*S*)-(-)-3,7-dimethyloctyloxy)-1,5-phenyleneimine) macrocycle ((-)-BCO-Cm6) in  $\text{CDCl}_3$ .

**Figure S32.**  $^{13}\text{C}$ -NMR spectrum of hexakis(2-((*S*)-(-)-3,7-dimethyloctyloxy)-1,5-phenyleneimine) macrocycle ((-)-BCO-Cm6) in  $\text{CDCl}_3$ .

## Experimental procedures

### *Synthesis of (S)-(-)-1-bromo-3,7-dimethyloctane*

(-)- $\beta$ -citronellol ((*S*)-(-)-3,7-dimethyl-6-octen-1-ol) (20.0 g, 0.128 mol), 5%Pd/C (1.50 g, 0.70 mmol as Pd), and tetrahydrofuran (solvent, 50 ml) were placed in a 100-mL glass-autoclave (TEM-V100, TAIATSU TECHNO Corp., Tokyo, Japan) equipped with a mechanical stirrer and a thermocouple. Hydrogen gas was supplied to the apparatus for 48 h at room temperature while maintaining a constant pressure of 1 MPa. The catalyst was filtered off through Celite® and the filtrate was dried with  $\text{MgSO}_4$ , then condensed to dryness by evaporation to give (*S*)-(-)-3,7-dimethyloctan-1-ol as a colorless liquid (yield 18.91 g, 93%). (Scheme S1)

In a 200-mL pear-shaped flask were placed (*S*)-(-)-3,7-dimethyloctan-1-ol (18.9 g, 0.119 mol), dichloromethane (100 ml), and  $\text{PBr}_3$  (25 g, 0.092 mol) was added gradually to the solution. The mixture was stirred magnetically at room temperature for 3 h. Water (100 mL) was added dropwise in order to decompose the unreacted  $\text{PBr}_3$ . The product was extracted with dichloromethane (100 mL) three times and the combined extract was dried over  $\text{MgSO}_4$ . The filtrate was concentrated by evaporation, then was distilled under reduced pressure to give (*S*)-(-)-1-bromo-3,7-dimethyloctane as a colorless liquid (b.p. 58 °C/3 mmHg). Yield: 9.58 g (36%). (Scheme S2)

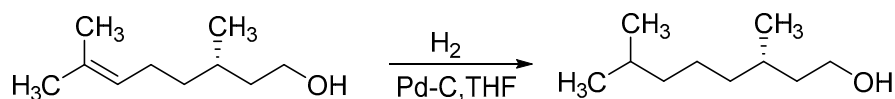

**Scheme S1.** Synthesis of (*S*)-(-)-3,7-dimethyloctan-1-ol.

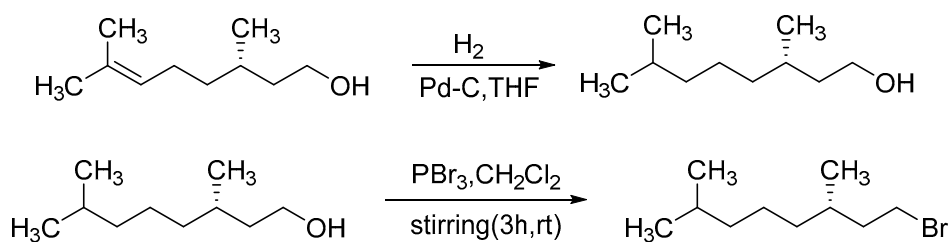

**Scheme S2.** Synthesis of (*S*)-(-)-1-bromo-3,7-dimethyloctane.

*Synthesis of 1-bromo-2-(2-(2-methoxyethoxy)ethoxy)ethane*

Triethylene glycol monomethyl ether (2-(2-(2-methoxyethoxy)ethoxy)ethanol) (30.35 g, 0.185 mol) and dichloromethane (100 ml) were placed in a 200-mL pear-shaped flask.  $\text{PBr}_3$  (25 g, 0.092 mol) was then gradually added to the solution. The mixture was magnetically stirred at room temperature for 3 h. Following a similar procedure as mentioned above, 1-bromo-2-(2-(2-methoxyethoxy)ethoxy)ethane was obtained as a colorless liquid (b.p. 78 °C/4 mmHg). The yield was 19.06 g (45%).

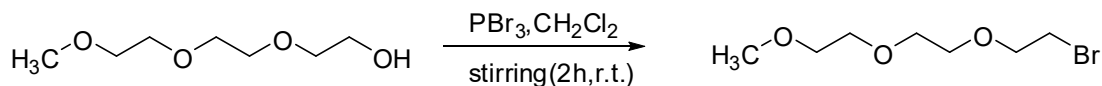

**Scheme S3.** Synthesis of 1-bromo-2-(2-(2-methoxyethoxy)ethoxy)ethane.

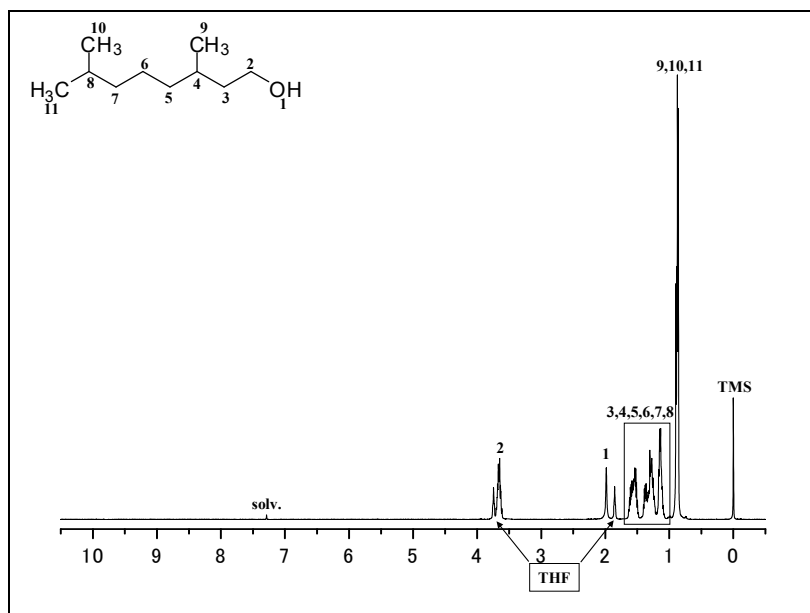

**Figure S1.**  $^1\text{H}$ -NMR spectrum of (*S*)-(-)-3,7-dimethyloctan-1-ol; solvent:  $\text{CDCl}_3$ .

$^1\text{H}$ -NMR ( $\delta$ , ppm): 0.87(d,  $J=6.7\text{Hz}$ , 6H), 0.89(d,  $J=6.4\text{Hz}$ , 3H), 1.08-1.16(m, 3H), 1.20-1.40(m, 4H), 1.47-1.63(m, 3H), 1.98(s, 1H), 3.61-3.70(m, 2H).

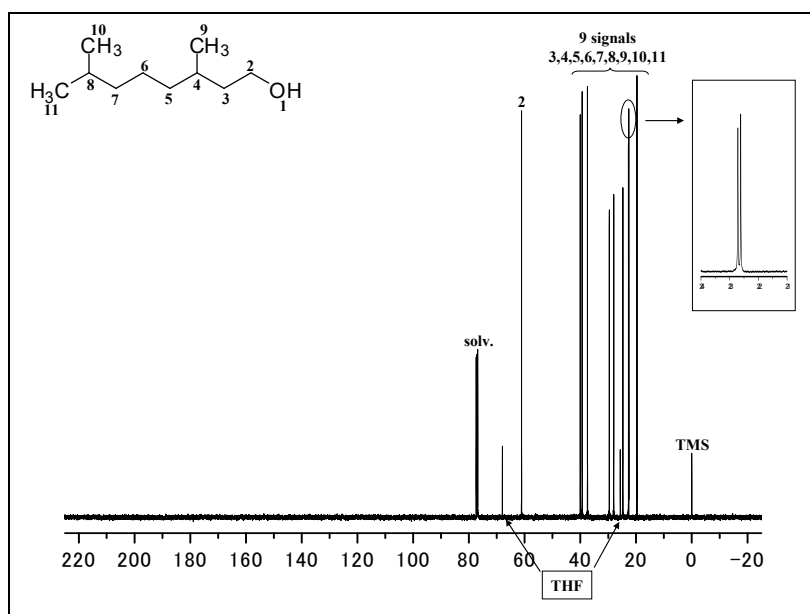

**Figure S2.**  $^{13}\text{C}$ -NMR spectrum of (*S*)-(-)-3,7-dimethyloctan-1-ol; solvent:  $\text{CDCl}_3$ .

$^{13}\text{C}$ -NMR ( $\delta$ , ppm): 19.66, 22.61, 22.71, 24.71, 27.99, 29.57, 37.44, 39.31, 40.02, 61.11.

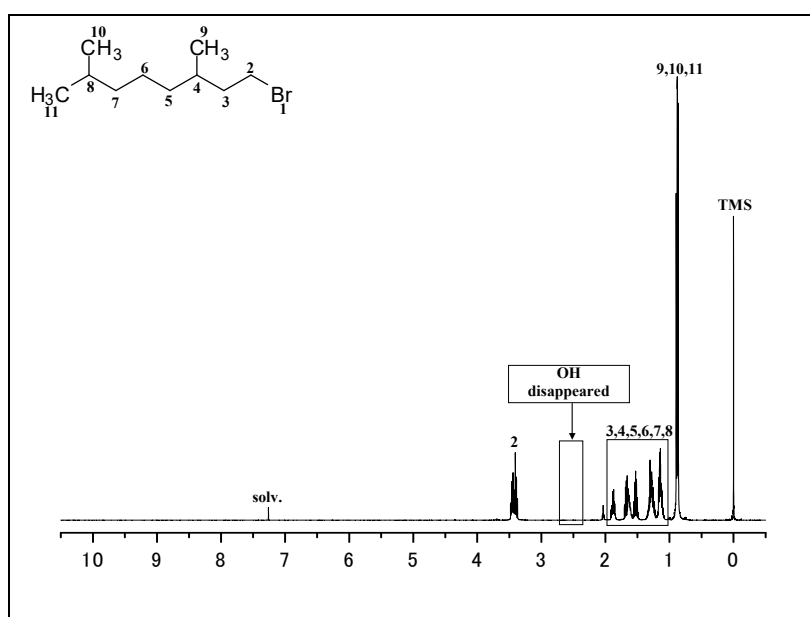

**Figure S3.**  $^1\text{H}$ -NMR spectrum of (*S*)-(-)-1-bromo-3,7-dimethyloctane; solvent:  $\text{CDCl}_3$ .

$^1\text{H}$ -NMR ( $\delta$ , ppm): 0.87(d,  $J=6.7\text{Hz}$ , 6H), 0.89(d,  $J=6.4\text{Hz}$ , 3H), 1.10-1.16(m, 3H), 1.22-1.33(m, 3H), 1.48-1.56(m, 1H), 1.16-1.70(m, 2H), 1.85-1.91(m, 1H), 3.37-3.48(m, 2H).

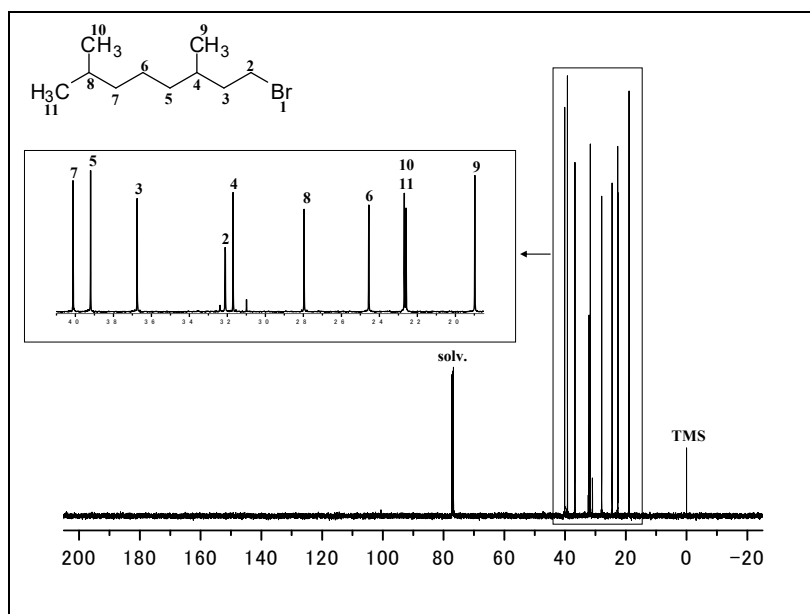

**Figure S4.**  $^{13}\text{C}$ -NMR spectrum of (S)-(-)-1-bromo-3,7-dimethyloctane; solvent:  $\text{CDCl}_3$ .

$^{13}\text{C}$ -NMR ( $\delta$ , ppm): 18.91, 22.59, 22.68, 24.55, 27.95, 31.70, 32.11, 36.75, 39.20, 40.12.

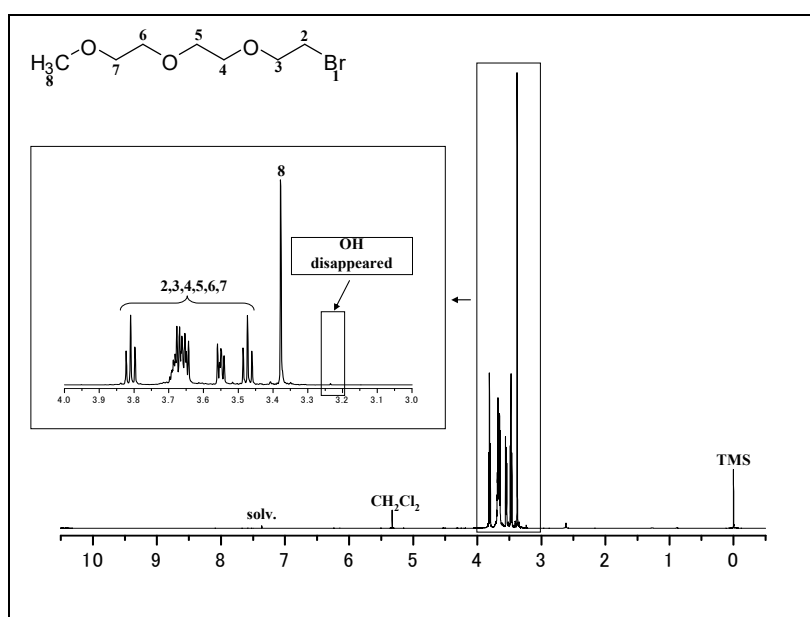

**Figure S5.**  $^1\text{H}$ -NMR spectrum of 1-bromo-2-(2-(2-methoxyethoxy)ethoxy)ethane; solvent:  $\text{CDCl}_3$ .

$^1\text{H}$ -NMR ( $\delta$ , ppm): 3.37(s,3H), 3.47(t,J=6.4Hz,2H), 3.54(t,J=4.5Hz,2H), 3.64–3.69(m,6H), 3.80(t,J=6.1Hz,2H).

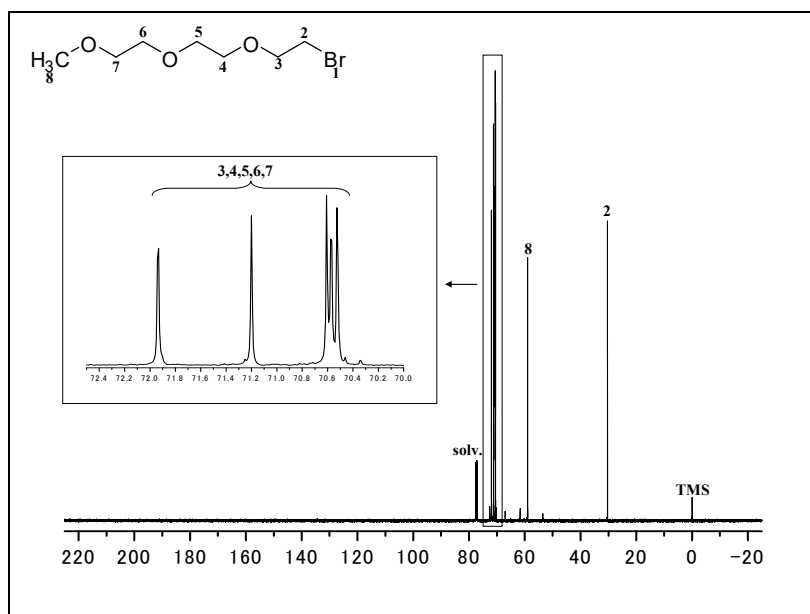

**Figure S6.**  $^{13}\text{C}$ -NMR spectrum of 1-bromo-2-(2-(2-methoxyethoxy)ethoxy)ethane; solvent:  $\text{CDCl}_3$ .

$^{13}\text{C}$ -NMR ( $\delta$ , ppm): 30.32, 58.96, 70.52, 70.57, 70.60, 71.20, 71.93.

## 2-Octyloxy-5-nitrobenzaldehyde

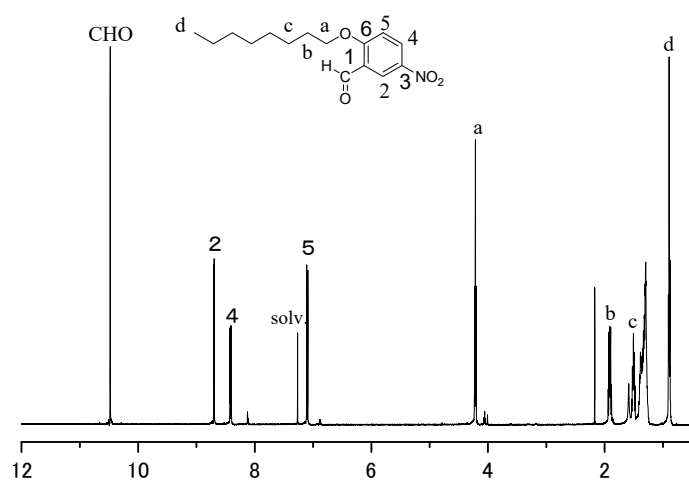

**Figure S7.**  $^1\text{H}$ -NMR spectrum of 2-octyloxy-5-nitrobenzaldehyde; solvent:  $\text{CDCl}_3$ .

$^1\text{H}$ -NMR ( $\delta$ , ppm): 0.89(t,  $J=6.1\text{Hz}$ , 3H, H-d), 1.30(m, 8H), 1.51(quin,  $J=7.7\text{Hz}$ , 2H, H-c), 1.91(quin,  $J=6.7\text{Hz}$ , 2H, H-b), 4.22(t,  $J=6.4\text{Hz}$ , 2H, H-a), 7.10(d,  $J=9.2$ , 1H, H-5), 8.41(quar,  $J=6.1\text{Hz}$ , 1H, H-4), 8.69(d,  $J=2.8\text{Hz}$ , 1H, H-2), 10.48(s, 1H, CHO).

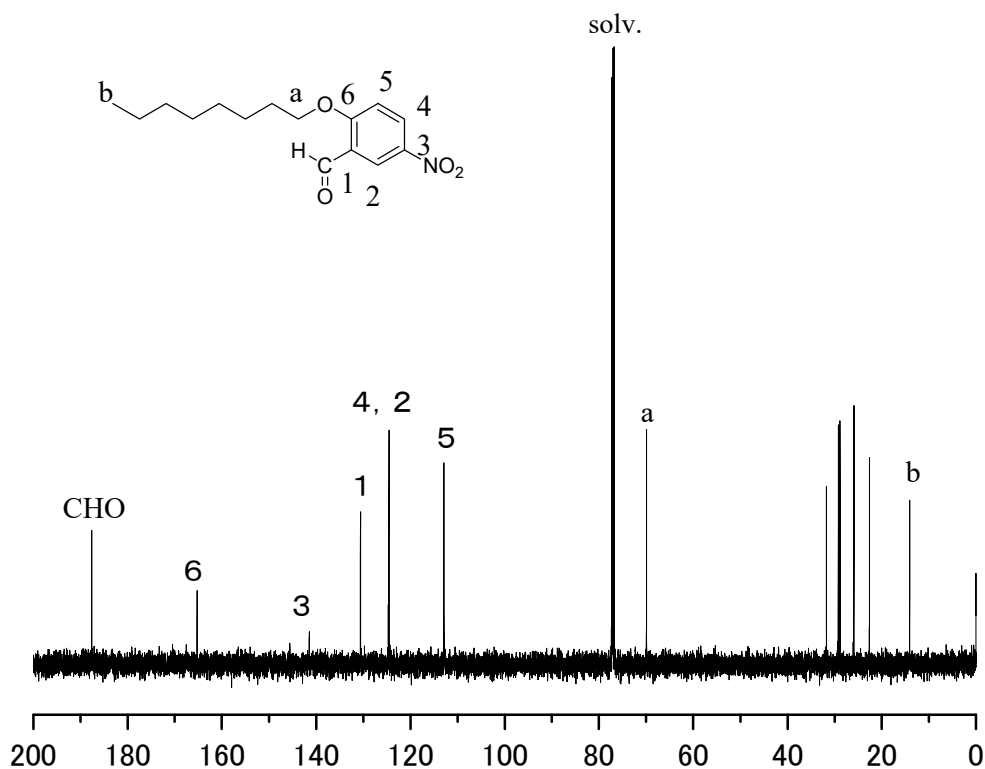

**Figure S8.**  $^{13}\text{C}$ -NMR spectrum of 2-octyloxy-5-nitrobenzaldehyde; solvent:  $\text{CDCl}_3$ .  
 $^{13}\text{C}$ -NMR ( $\delta$ , ppm): 14.1(C-b), 28.9, 29.16, 29.23, 31.8, 69.9(C-a), 112.9(C-5), 124.5(C-2), 124.7(C-4), 130.6(C-1), 141.5(C-3), 165.3(C-6), 187.6(CHO).

## 2-((*S*)-(-)-3,7-Dimethyloctyloxy)-5-nitrobenzaldehyde

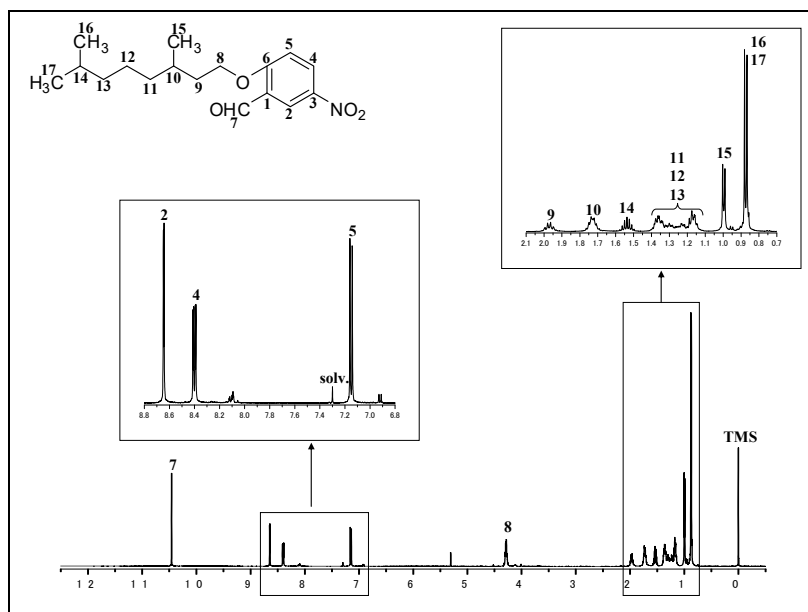

**Figure S9.**  $^1\text{H}$ -NMR spectrum of 2-((*S*)-(-)-3,7-dimethyloctyloxy)-5-nitrobenzaldehyde; solvent:  $\text{CDCl}_3$ .

$^1\text{H}$ -NMR ( $\delta$ , ppm): 0.87(d,  $J=6.7\text{Hz}$ , 6H), 1.00(d,  $J=6.1\text{Hz}$ , 3H), 1.14–1.39(m, 6H), 1.49–1.57(m, 1H), 1.93–1.99(m, 2H), 4.25–4.32(m, 2H), 7.15(d,  $J=9.1\text{Hz}$ , 1H), 8.40(d,  $J=9.4\text{Hz}$ , 1H), 8.64(d,  $J=2.7\text{Hz}$ , 1H), 10.45(s, 1H).

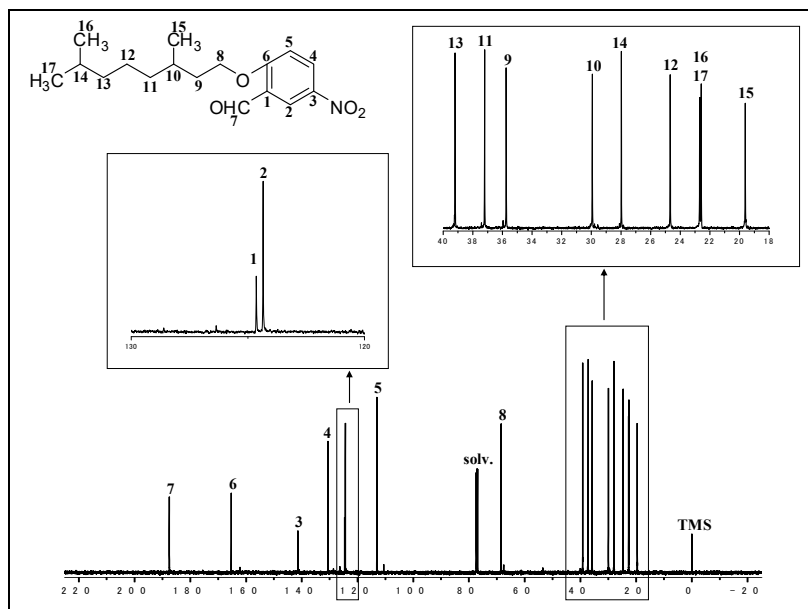

**Figure S10.**  $^{13}\text{C}$ -NMR spectrum of 2-((*S*)-(-)-3,7-dimethyloctyloxy)-5-nitrobenzaldehyde; solvent:  $\text{CDCl}_3$ .

$^{13}\text{C}$ -NMR ( $\delta$ , ppm): 19.6, 22.6, 22.7, 24.7, 28.0, 29.9, 35.7, 37.2, 39.2, 68.4, 113.1, 124.3, 124.6, 130.6, 141.4, 165.3, 187.5.

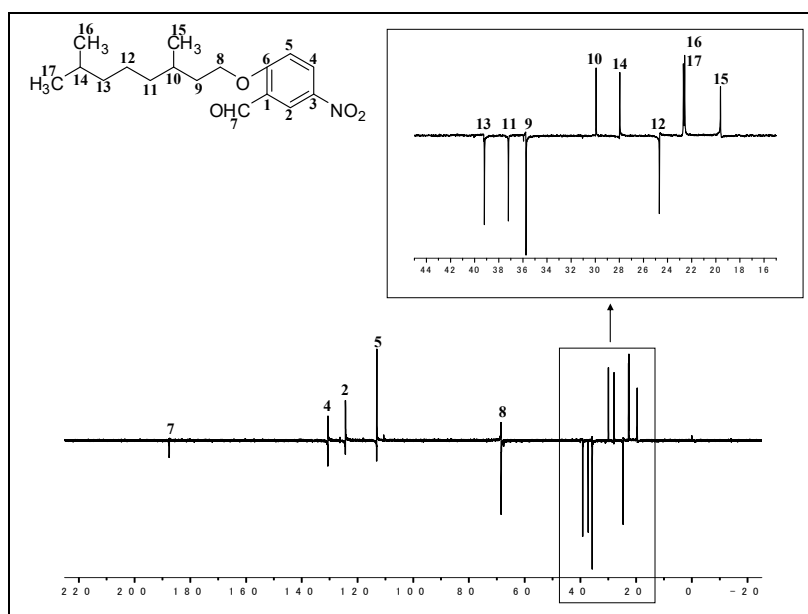

**Figure S11.**  $^{13}\text{C}$ -NMR (DEPT-135) spectrum of 2-((*S*)-(-)-3,7-dimethyloctyloxy)-5-nitrobenzaldehyde; solvent:  $\text{CDCl}_3$ .

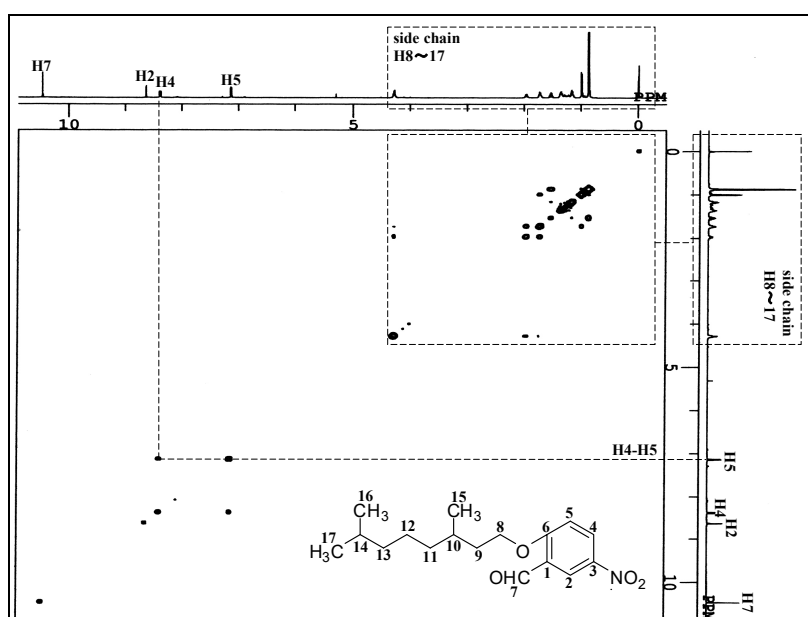

**Figure S12.** H,H-cosy spectrum of 2-((*S*)-(-)-3,7-dimethyloctyloxy)-5-nitrobenzaldehyde; solvent:  $\text{CDCl}_3$ .

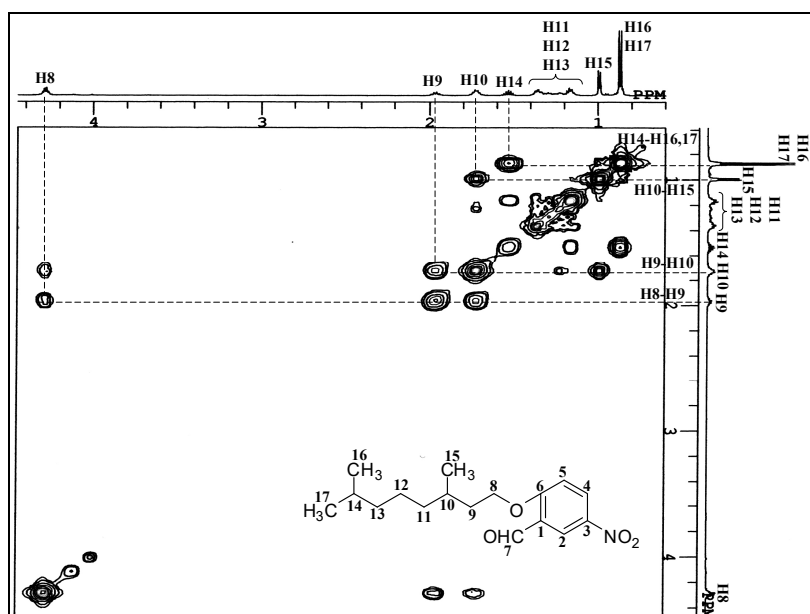

**Figure S13.** H,H-cosy spectrum of 2-(*S*)-(-)-(3,7-dimethyloctyloxy)-5-nitrobenzaldehyde; solvent: CDCl<sub>3</sub>. (expanded)

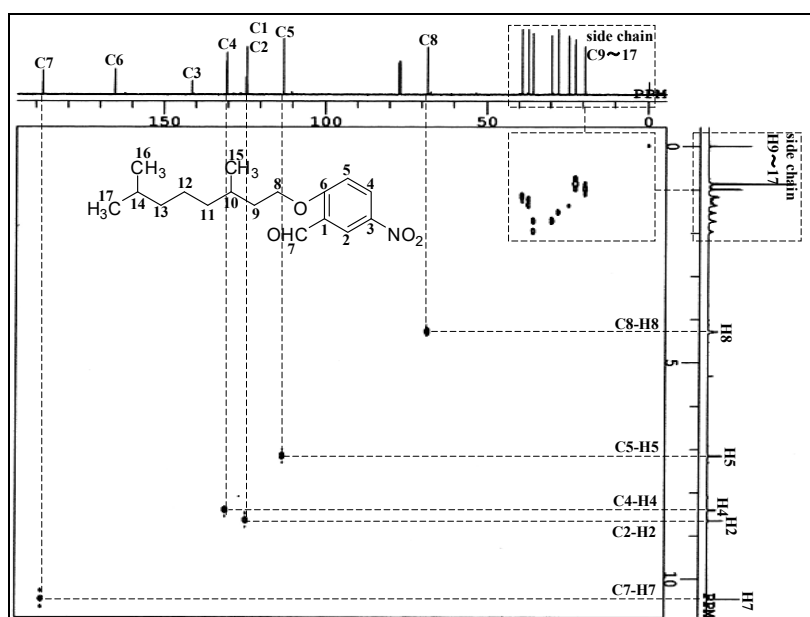

**Figure S14.** C,H-cosy spectrum of 2-((*S*)-(-)-3,7-dimethyloctyloxy)-5-nitrobenzaldehyde; solvent: CDCl<sub>3</sub>.

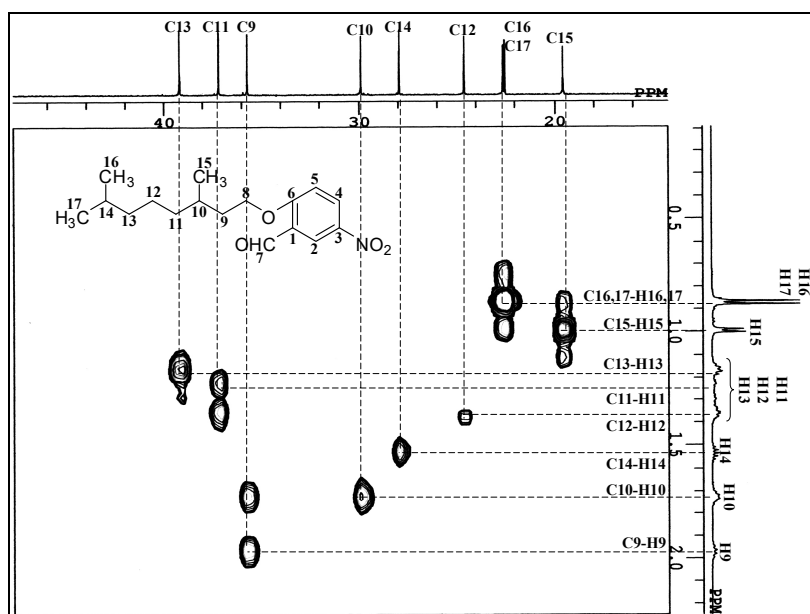

**Figure S15.** C,H-cosy spectrum of 2-((*S*)-(-)-3,7-dimethyloctyloxy)-5-nitrobenzaldehyde; solvent: CDCl<sub>3</sub>. (expanded)

## 2-(2-(2-(2-methoxyethoxy)ethoxy)ethoxy)-5-nitrobenzaldehyde

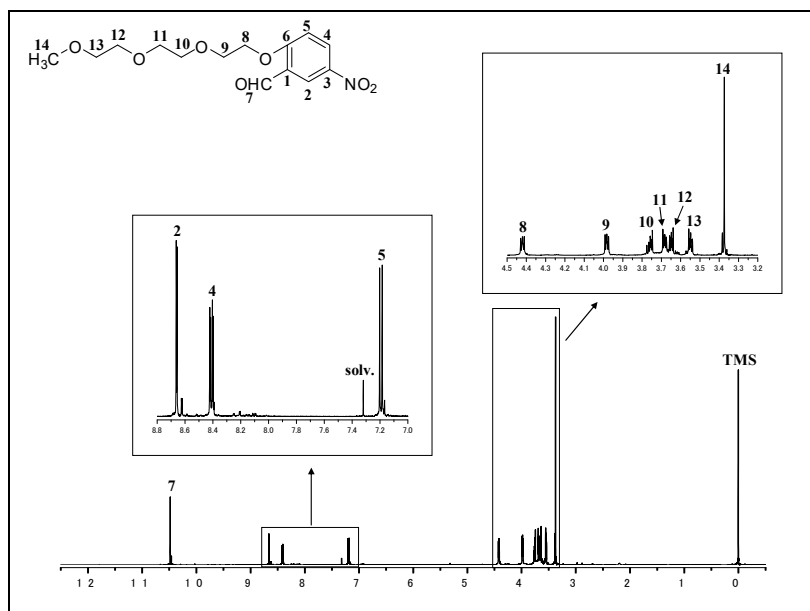

**Figure S16.** <sup>1</sup>H-NMR spectrum of 2-(2-(2-(2-methoxyethoxy)ethoxy)ethoxy)-5-nitrobenzaldehyde; solvent: CDCl<sub>3</sub>.

<sup>1</sup>H-NMR(δ, ppm): 3.37(s,3H), 3.53–3.55(m,2H), 3.63–3.69(m,4H), 3.74–3.77(m,2H), 3.98(t,J=4.5,2H), 4.42(t,J=4.5Hz, 2H), 7.19(d,J=9.4Hz,1H), 8.41(d,J=6.4Hz,1H), 8.66(d,J=2.7Hz,1H), 10.48(s,1H).

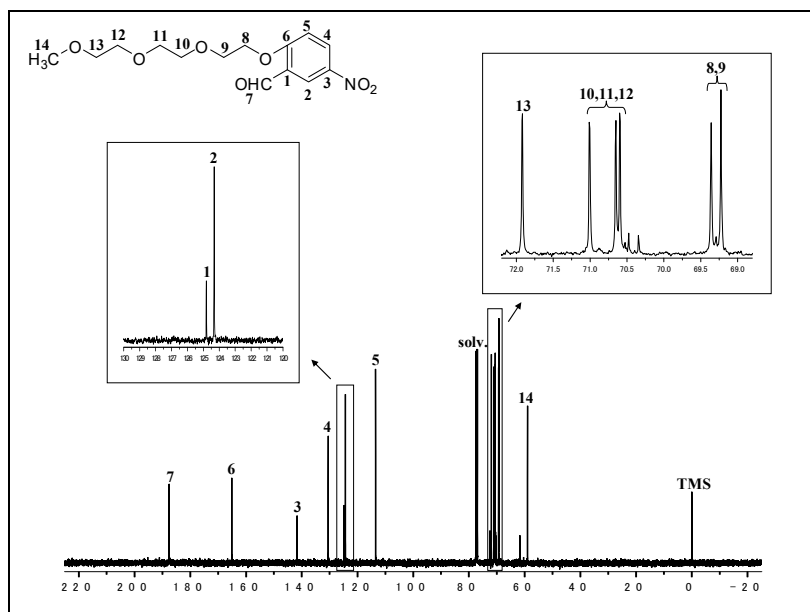

**Figure S17.**  $^{13}\text{C}$ -NMR spectrum of 2-(2-(2-(2-methoxyethoxy)ethoxy)ethoxy)-5-nitrobenzaldehyde; solvent:  $\text{CDCl}_3$ , internal standard: TMS.

$^{13}\text{C}$ -NMR ( $\delta$ , ppm): 59.0, 69.2, 69.4, 70.6, 70.6, 71.0, 71.9, 113.5, 124.3, 124.8, 130.5, 141.7, 165.1, 187.6.

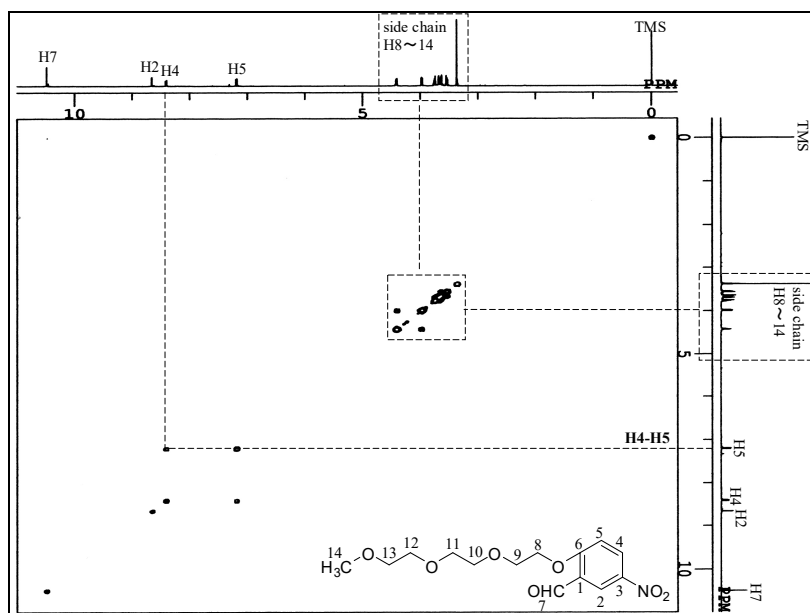

**Figure S18.** H,H-cosy spectrum of 2-(2-(2-(2-methoxyethoxy)ethoxy)ethoxy)-5-nitrobenzaldehyde; solvent:  $\text{CDCl}_3$ .

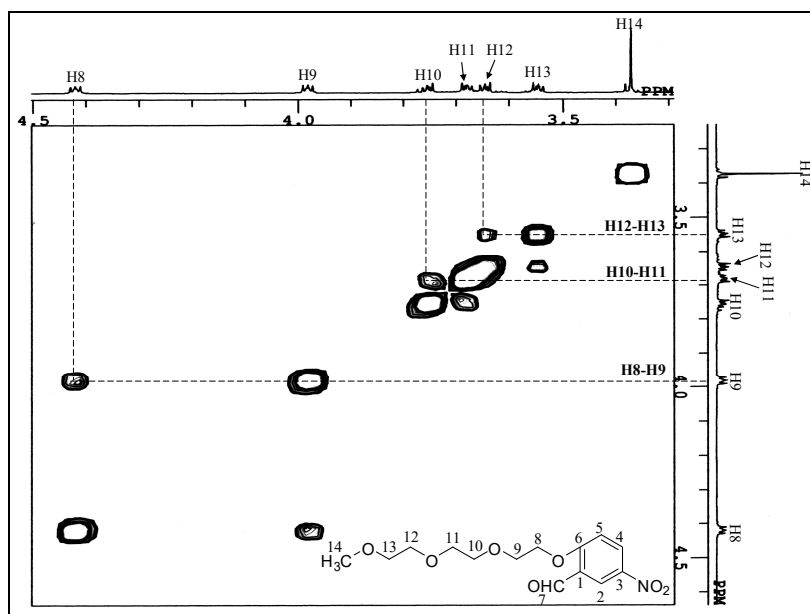

**Figure S19.**  $^2\text{H}$ - $^1\text{H}$ -cosy spectrum of 2-(2-(2-(2-methoxyethoxy)ethoxy)ethoxy)-5-nitrobenzaldehyde; solvent:  $\text{CDCl}_3$ . (expanded)

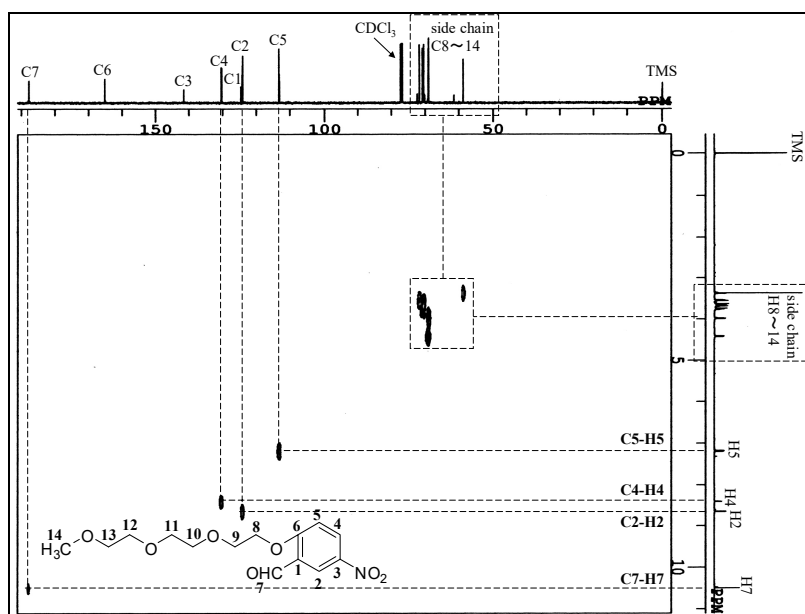

**Figure S20.**  $^{13}\text{C}$ , $^1\text{H}$ -cosy spectrum of 2-(2-(2-(2-methoxyethoxy)ethoxy)ethoxy)-5-nitrobenzaldehyde; solvent:  $\text{CDCl}_3$ .

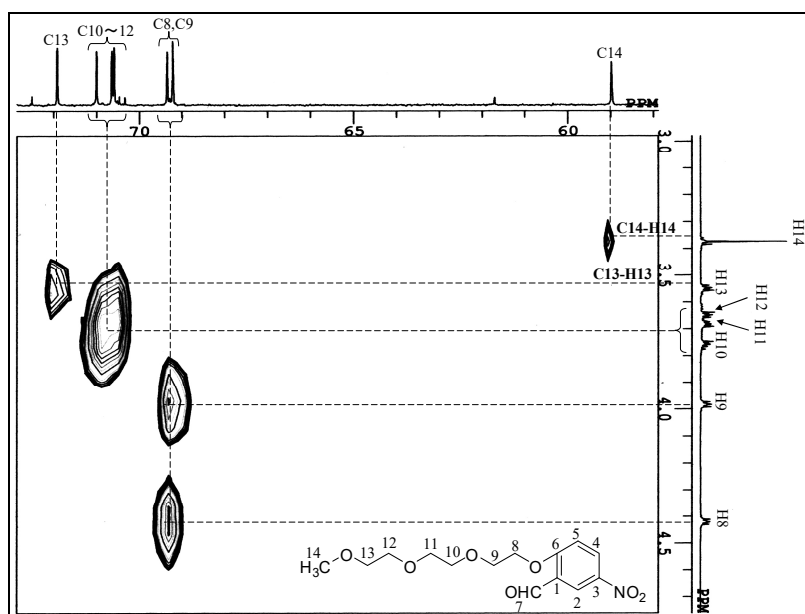

**Figure S21.** C,H-cosy spectrum of 2-(2-(2-(2-methoxyethoxy)ethoxy)ethoxy)-5-nitrobenzaldehyde; solvent: CDCl<sub>3</sub>. (expanded)

## 2-Octyloxy-5-nitrobenzaldehyde diethyl acetal

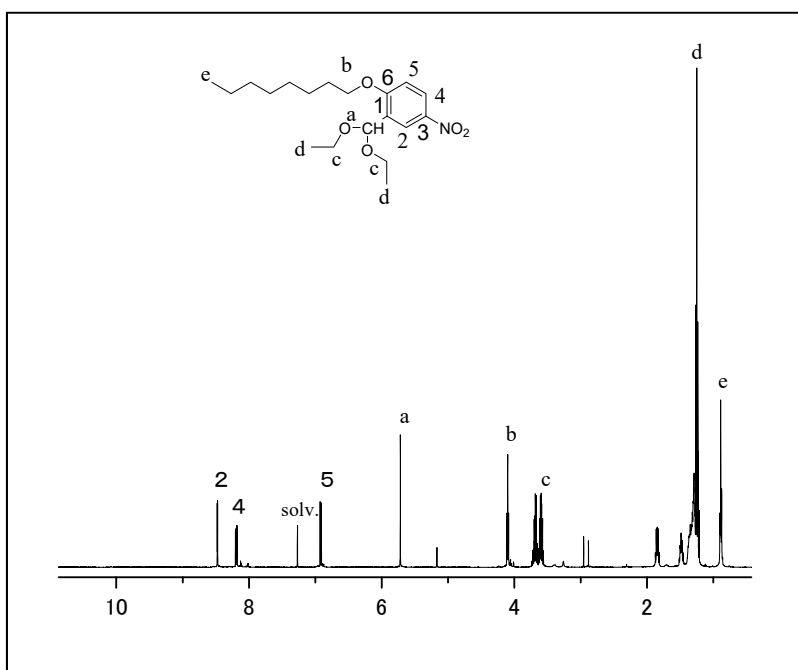

**Figure S22.** <sup>1</sup>H-NMR spectrum of 2-octyloxy-5-nitrobenzaldehyde diethyl acetal; solvent: CDCl<sub>3</sub>.

<sup>1</sup>H-NMR (δ, ppm): 0.89(t, J=6.7Hz, 3H, H-e), 1.25(t, J=7.0Hz, 6H, H-d), 1.29(m, 8H), 1.49(quin, J=7.6Hz, 2H), 1.85(quin, J=7.0Hz, 2H), 3.63(m, 4H, H-c), 4.10(t, J=6.4Hz, 2H, H-b), 5.72(s, 1H, -CH-(acetal)), 6.91(d, J=8.9Hz, 1H, H-5), 8.18(quin, J=6.1Hz, 1H, H-4), 8.47(d, J=2.8Hz, 1H, H-2)

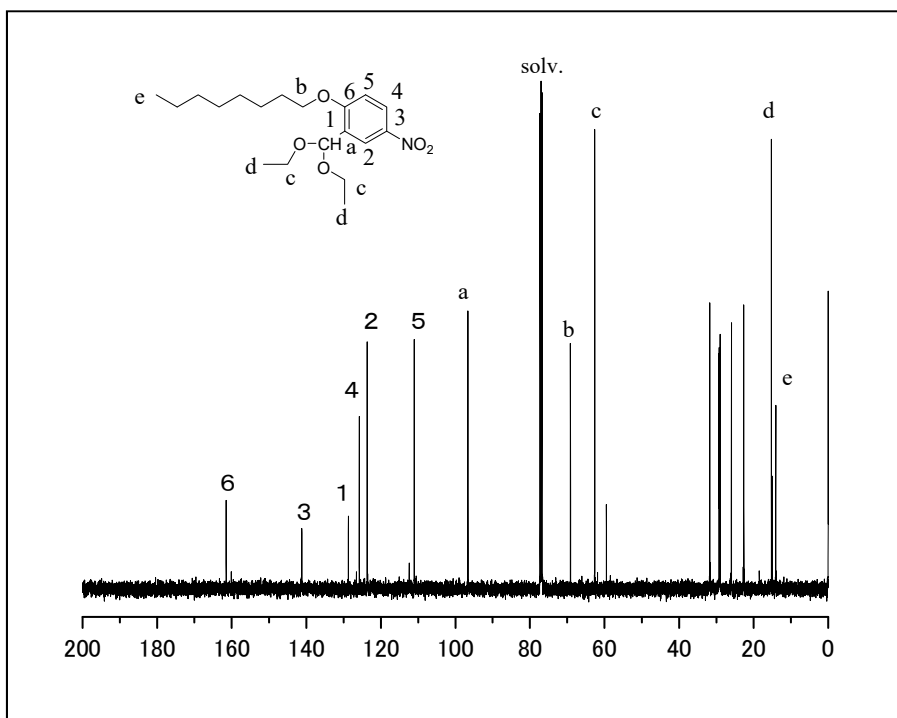

**Figure S23.**  $^{13}\text{C}$ -NMR spectrum of 2-octyloxy-5-nitrobenzaldehyde diethyl acetal; solvent:  $\text{CDCl}_3$ .

$^{13}\text{C}$ -NMR ( $\delta$ , ppm): 14.1(C-e), 15.2(C-d), 29.0, 29.2, 29.3, 31.8, 62.6(C-c), 69.1(C-b), 96.7(C-a), 111.1(C-5), 123.6(C-2), 125.8(C-4), 128.7(C-1), 141.2(C-3), 161.5(C-6).

## 2-((*S*)-(-)-3,7-Dimethyloctyloxy)-5-nitrobenzaldehyde diethyl acetal

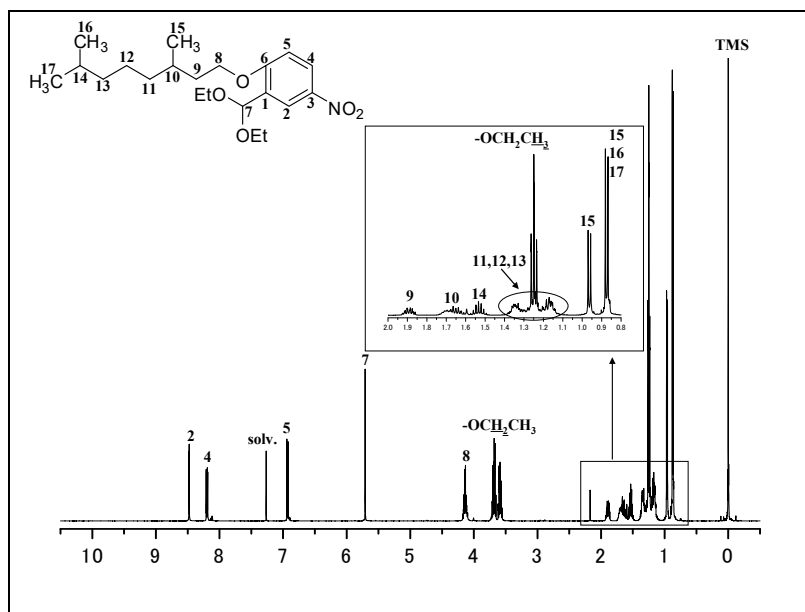

**Figure S24.**  $^1\text{H}$ -NMR spectrum of 2-((*S*)-(-)-3,7-dimethyloctyloxy)-5-nitrobenzaldehyde diethyl acetal; solvent:  $\text{CDCl}_3$ .

$^1\text{H}$ -NMR ( $\delta$ , ppm): 0.87(d,  $J=6.7\text{Hz}$ , 6H), 0.96(d,  $J=6.4\text{Hz}$ , 3H), 1.14–1.36(m, 6H), 1.24(t,  $J=7.0\text{Hz}$ , 6H), 1.49–1.73(m, 3H), 1.86–1.92(m, 1H), 3.56–3.71(m, 4H), 4.11–4.15(m, 2H), 6.93(d,  $J=9.1\text{Hz}$ , 1H), 8.19(d,  $J=9.1\text{Hz}$ , 1H), 8.48(d,  $J=2.7\text{Hz}$ , 1H).

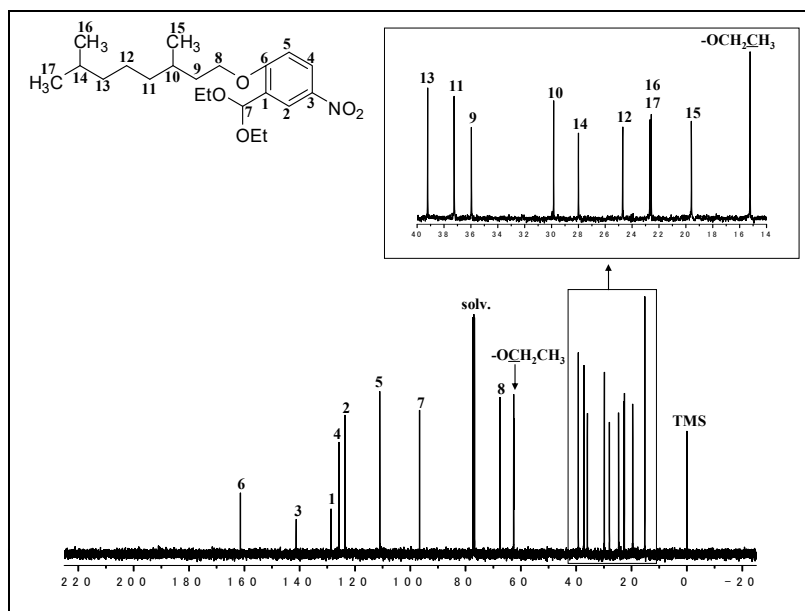

**Figure S25.**  $^{13}\text{C}$ -NMR spectrum of 2-((*S*)-(-)-3,7-dimethyloctyloxy)-5-nitrobenzaldehyde diethyl acetal; solvent:  $\text{CDCl}_3$ .

$^{13}\text{C}$ -NMR ( $\delta$ , ppm): 15.2, 19.6, 22.6, 22.7, 24.7, 278.0, 29.8, 36.0, 37.2, 39.2, 62.6, 67.5, 96.7, 111.0, 123.6, 125.8, 128.7, 141.2, 161.4.

## 2-(2-(2-(2-methoxyethoxy)ethoxy)ethoxy)-5-nitrobenzaldehyde diethyl acetal

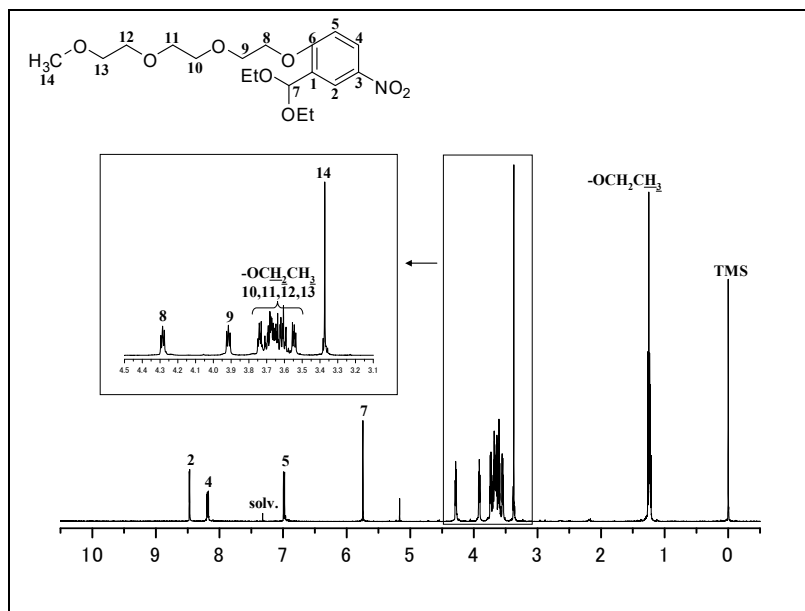

**Figure S26.**  $^1\text{H}$ -NMR of 2-(2-(2-(2-methoxyethoxy)ethoxy)ethoxy)-5-nitrobenzaldehyde diethylacetal; solvent:  $\text{CDCl}_3$ .

$^1\text{H}$ -NMR ( $\delta$ , ppm): 1.21(t,  $J=7.0\text{Hz}$ , 6H), 3.37(s, 3H), 3.53–3.55(m, 2H), 3.59–3.71(m, 8H), 3.73–3.74(m, 2H), 3.91(t,  $J=4.8\text{Hz}$ , 2H), 4.28(t,  $J=4.5\text{Hz}$ , 2H), 5.74(s, 1H), 6.98(d,  $J=9.1\text{Hz}$ , 1H), 8.10(d,  $J=6.1\text{Hz}$ , 1H), 8.47(d,  $J=3.0\text{Hz}$ , 1H).

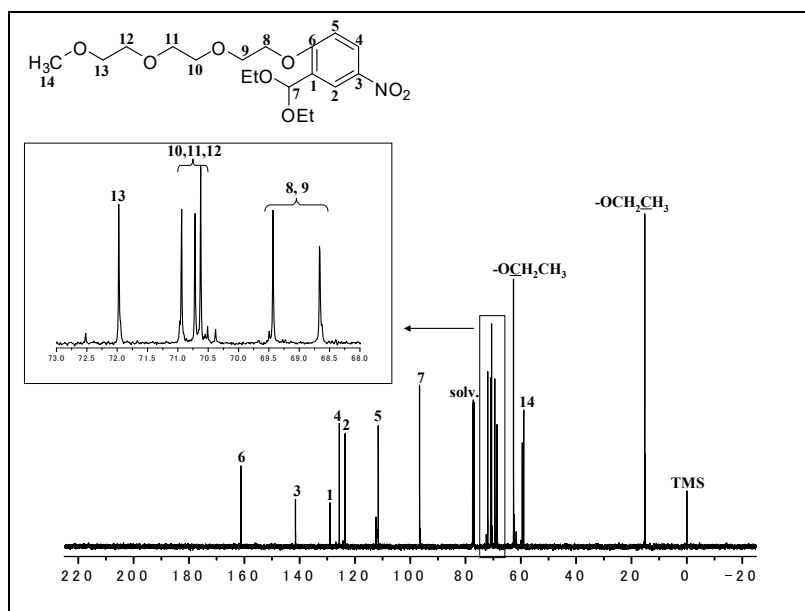

**Figure S27.**  $^{13}\text{C}$ -NMR of 2-(2-(2-(2-methoxyethoxy)ethoxy)ethoxy)-5-nitrobenzaldehyde diethylacetal; solvent:  $\text{CDCl}_3$ .

$^{13}\text{C}$ -NMR ( $\delta$ , ppm): 15.2, 59.0, 62.7, 68.7, 69.4, 70.6, 70.7, 70.9, 72.0, 96.6, 111.6, 123.6, 125.6, 129.1, 141.5, 161.2.

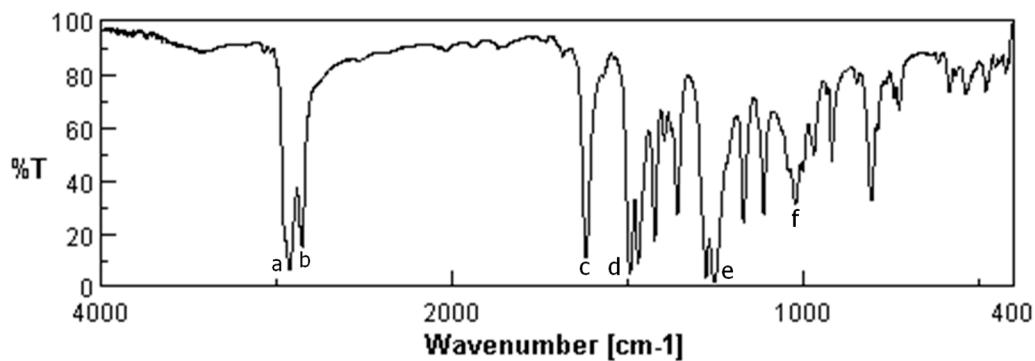

**Figure S28.** FT-IR spectrum of hexakis(2-octyloxy-1,5-phenyleneimine) macrocycle OcO-Cm6.

FT-IR(KBr,  $\text{cm}^{-1}$ ): 2925 ( $\nu\text{C-H,CH}_3$ ), 2852 ( $\nu\text{C-H,CH}_2$ ), 1618 ( $\nu\text{C=N}$ ), 1492, 1253, 1021.

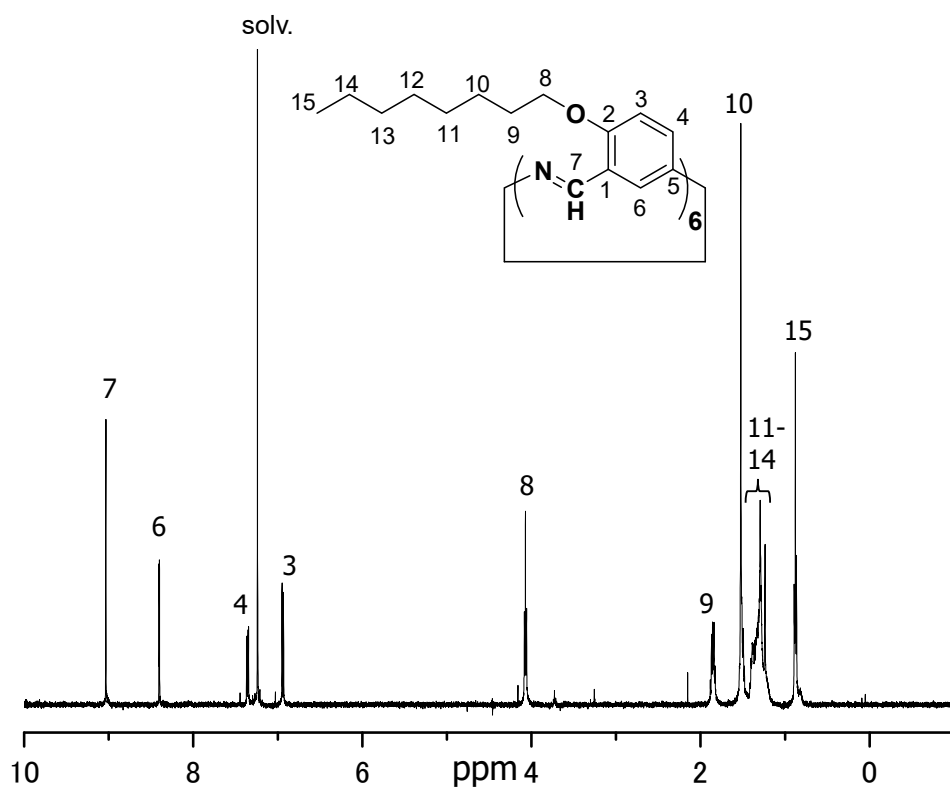

**Figure S29.**  $^1\text{H}$ -NMR spectrum of hexakis(2-octyloxy-1,5-phenyleneimine) macrocycle (OcO-Cm6) in  $\text{CDCl}_3$ .

$^1\text{H}$ -NMR( $\delta$ , ppm): 0.83(t,  $J=7.0\text{Hz}$ , 3H, H-15), 1.24(m, 8H, H-11, 12, 13, 14), 1.48(quin,  $J=10.4\text{Hz}$ , 2H, H-10), 1.81(quin,  $J=8.0\text{Hz}$ , 2H, H-9), 4.02(t,  $J=6.7\text{Hz}$ , 2H, H-8), 6.90(d,  $J=8.9\text{Hz}$ , 1H, H-3), 7.30(quar,  $J=2.7\text{Hz}$ , 1H, H-4), 8.35(d,  $J=2.7\text{Hz}$ , 1H, H-6), 8.98(s, 1H, H-7).

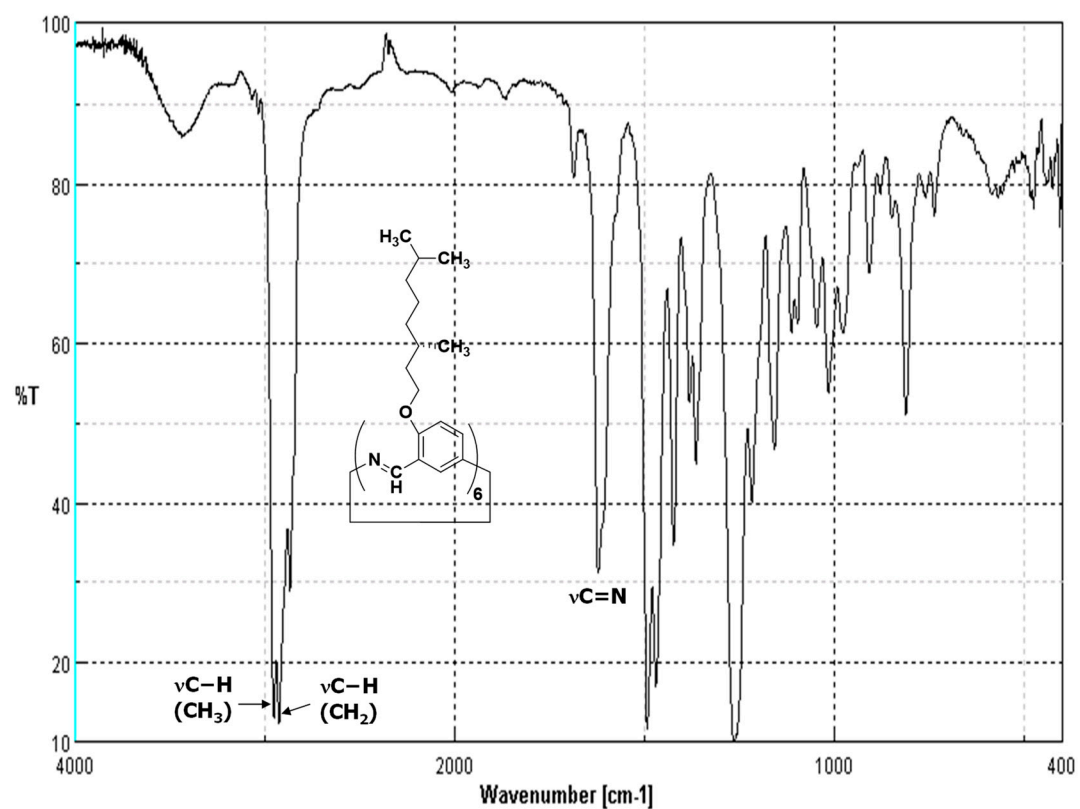

**Figure S30.** FT-IR spectrum of hexakis(2-((*S*)-(-)-3,7-dimethyloctyloxy)-1,5-phenyleneimine) macrocycle ((-)-BCO-Cm6).

FT-IR(KBr, cm<sup>-1</sup>): 2925(νC-H,CH<sub>3</sub>), 2869(νC-H,CH<sub>2</sub>), 1623(νCH=N), 1494, 1383, 1364, 1265, 1016.

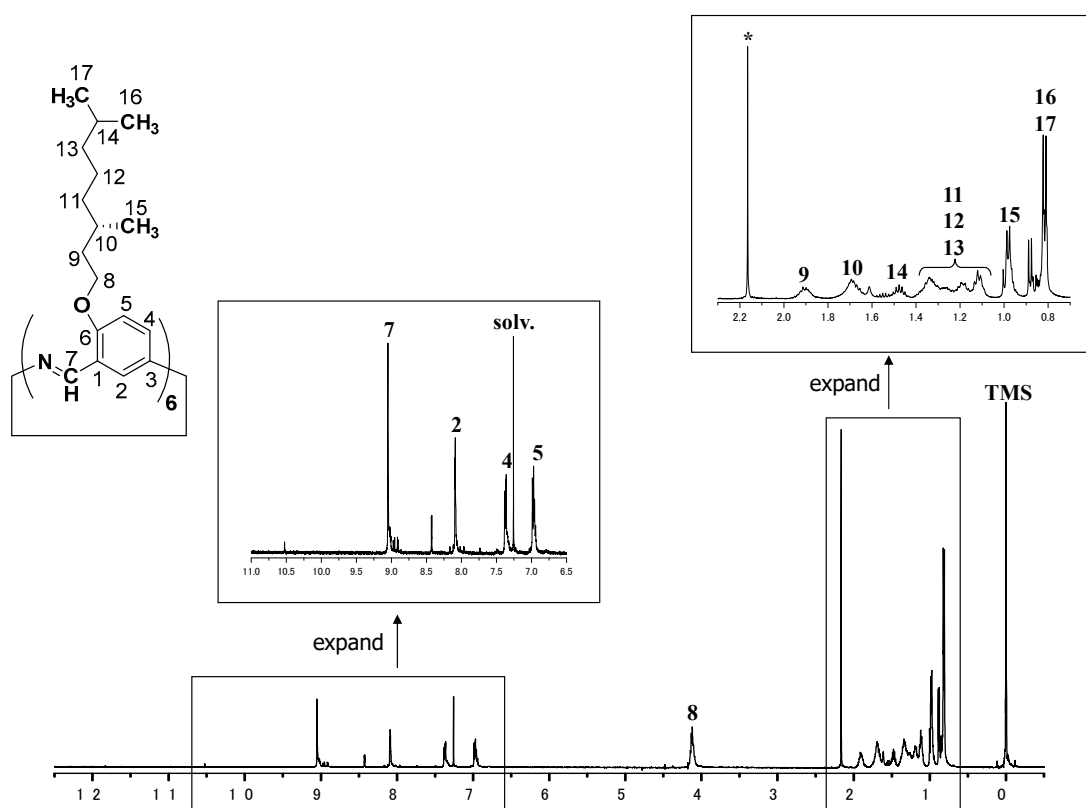

**Figure S31.**  $^1\text{H}$ -NMR spectrum of hexakis(2-((*S*)-(-)-3,7-dimethyloctyloxy)-1,5-phenyleneimine) macrocycle ((-)-BCO-Cm6) in  $\text{CDCl}_3$ .

$^1\text{H}$ -NMR( $\delta$ , ppm): 0.82(d,  $J=6.7\text{Hz}$ , 6H, H-16,17), 0.98(d,  $J=6.4\text{Hz}$ , 3H, H-15),  
 1.08–1.39(m, 6H, H-11,12,13), 1.45–1.72(m, 2H, H-10,14), 1.87–1.93(m, 2H, H-9),  
 4.08–4.14(m, 2H, H-8), 6.98(d,  $J=8.8\text{Hz}$ , 1H, H-3), 7.37(d,  $J=8.8\text{Hz}$ , 1H, H-4),  
 8.09(d,  $J=2.7\text{Hz}$ , 1H, H-6), 9.05(s, 1H, H-7).

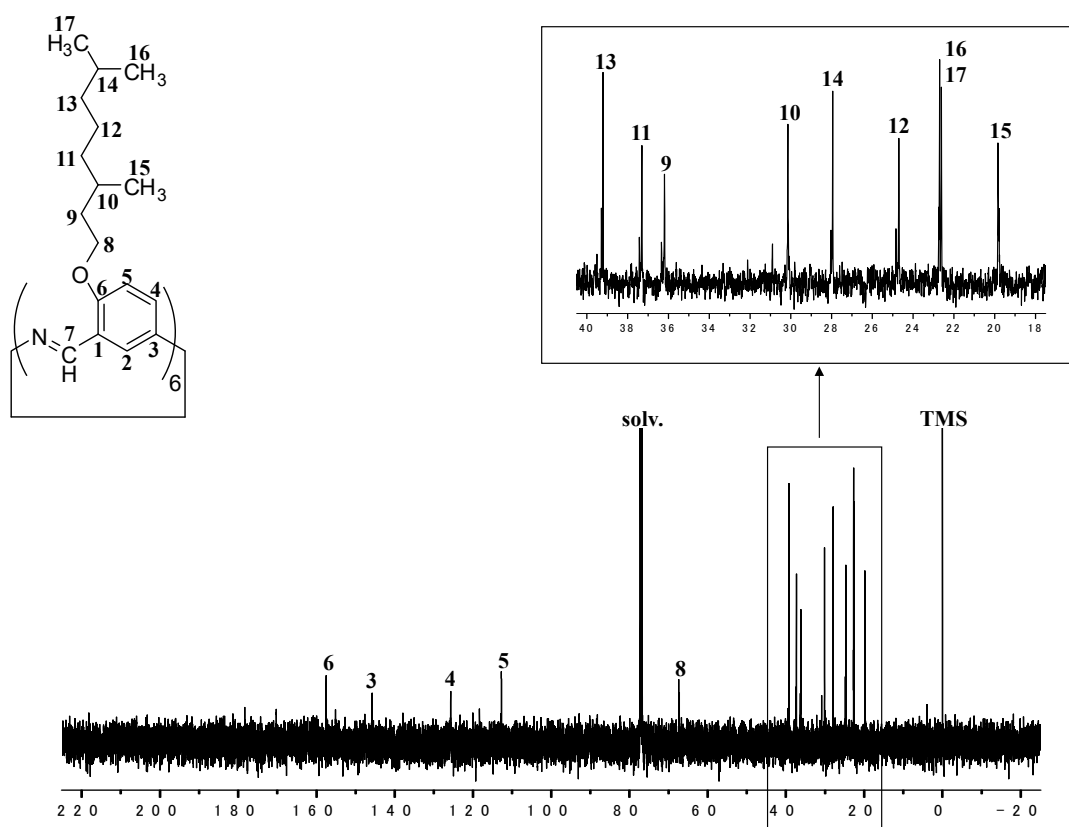

**Figure S32.**  $^{13}\text{C}$ -NMR spectrum of hexakis(2-((*S*)-(-)-3,7-dimethyloctyloxy)-1,5-phenyleneimine) macrocycle ((-)-BCO-Cm6) in  $\text{CDCl}_3$ .

$^{13}\text{C}$ -NMR( $\delta$ , ppm): 19.8(C-15), 22.6(C-17), 22.7(C-16), 24.7(C-12), 27.9(C-14), 30.1(C-10), 36.2(C-9), 37.3(C-11), 39.2(C-13), 67.4(C-8), 112.7(C-5), 125.7(C-4), 145.8(C-3), 157.5(C-6).
